# Supplementary material for: Complete Genome Sequence of Pseudomonas chlororaphis subsp. aurantiaca Reveals a Triplicate Quorum-Sensing Mechanism for Regulation of Phenazine Production
Source: PubMed Central journal article supplement (PMC5371074; doi:10.1264/jsme2.me16162), 2017-02-25
Supplement: 32_47_s1.pdf [file 32_47_s1.pdf]

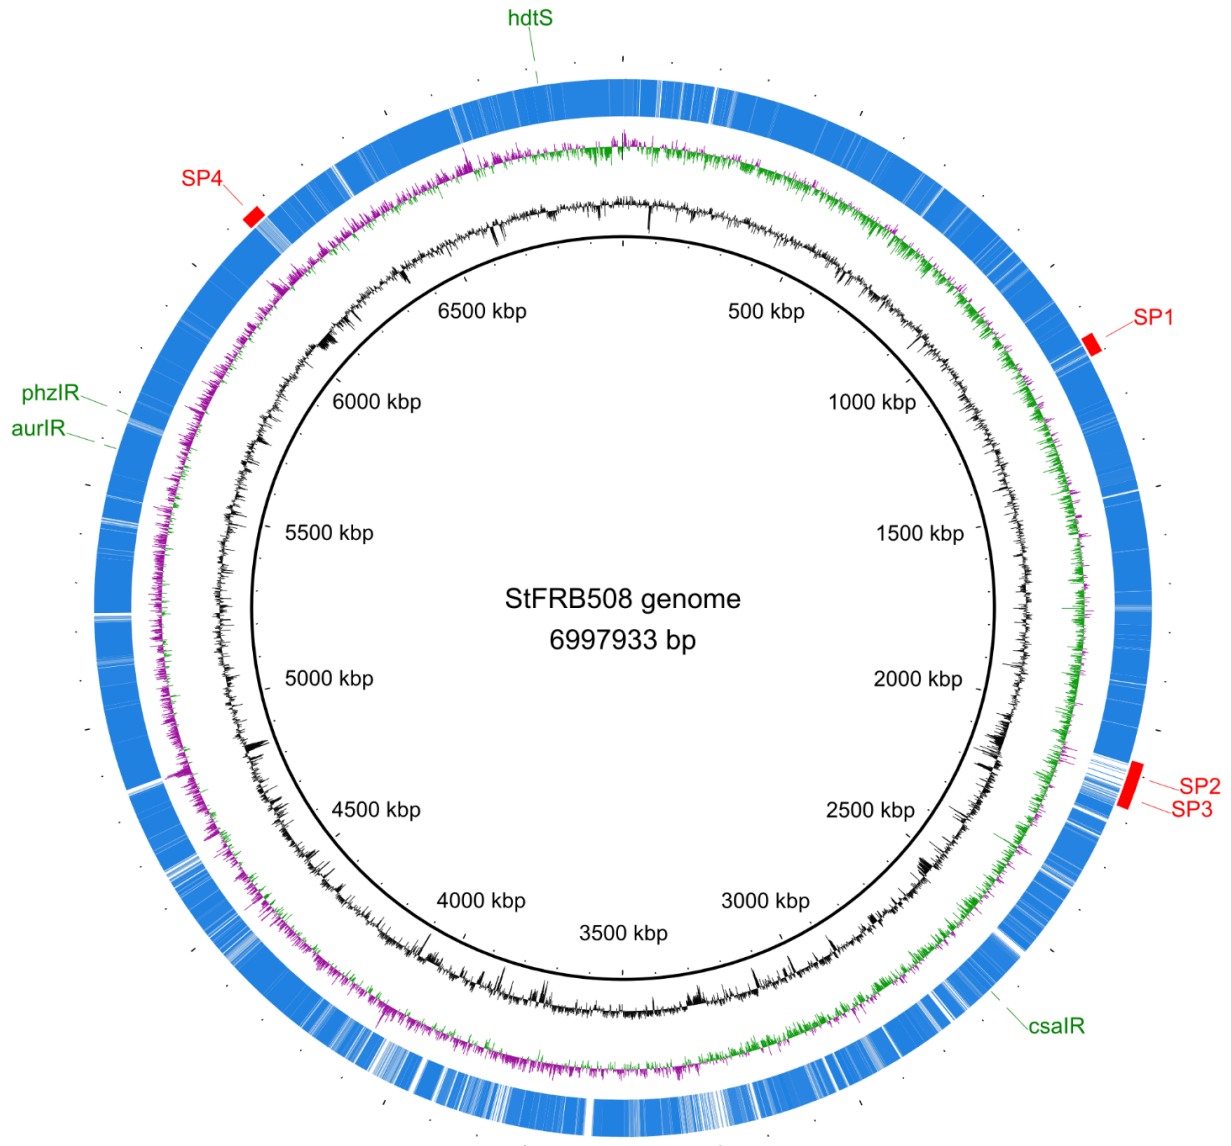

**Fig S1.** Genome map of StFRB508. Starting from the inside, circle 1 represents the mean of centered G + C content (bars facing outside, above mean; bars facing inside, below mean); circle 2 shows the GC skew  $(G - C)/(G + C)$ ; circle 3 represents comparison of gene content with *P. chlororaphis* subsp. *aurantiaca* JD37; the outermost ring highlights the regions of genetic elements. Prophage (SP) is shown in red and quorum sensing-related genes are shown in green. The inner black circle shows the scale line in kbps. The circular map that illustrates the general genomic feature as well as its comparison with another strain was plotted by using the BRIG program (<http://brig.sourceforge.net/>). The putative prophage regions were identified by PHAST program (<http://phast.wishartlab.com/>).

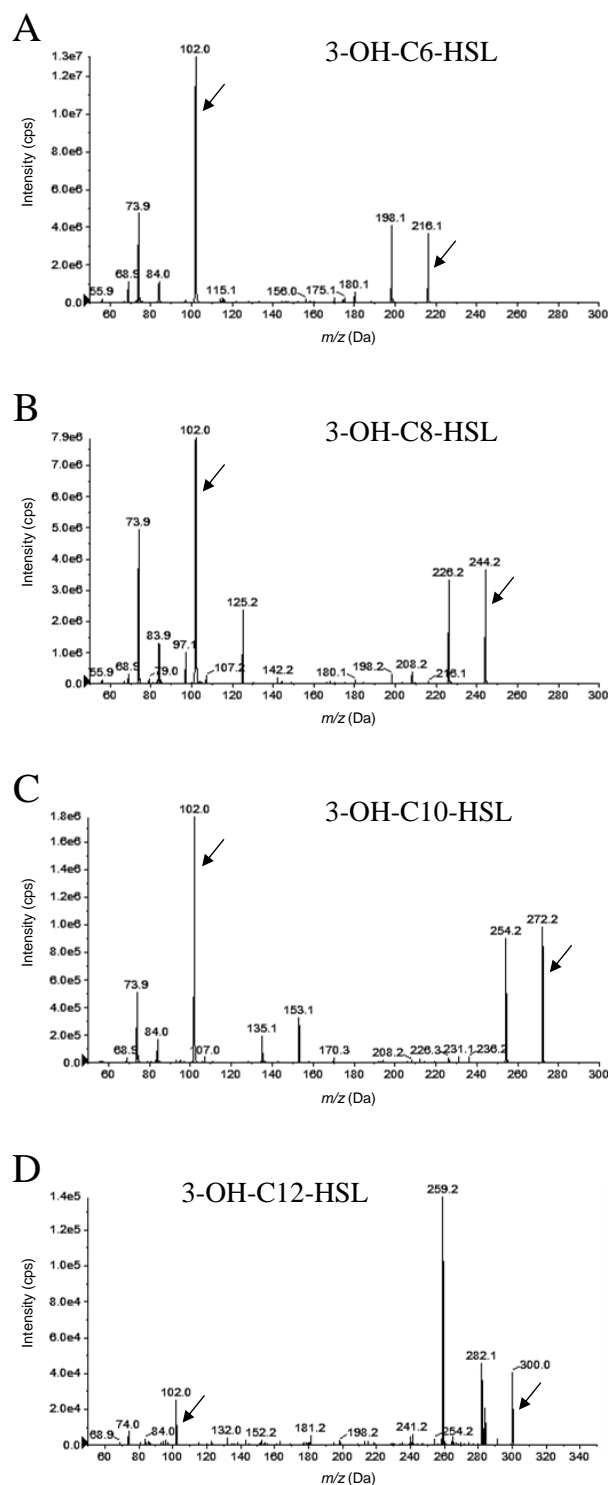

**Fig. S2.** Mass spectra of AHLs extracted from the cell-free supernatant of 508ACI for PhzI. After fractionation by reverse-phase HPLC, the ESI-MS/MS fragment peaks of AHLs were analyzed. All corresponding peaks for respective 3-OH-C6-HSL (A;  $m/z$  216), 3-OH-C8-HSL (B;  $m/z$  244), 3-OH-C10-HSL (C;  $m/z$  272), and 3-OH-C12-HSL (D;  $m/z$  300) along with the product ion peaks ( $m/z$  102) are marked by arrows.

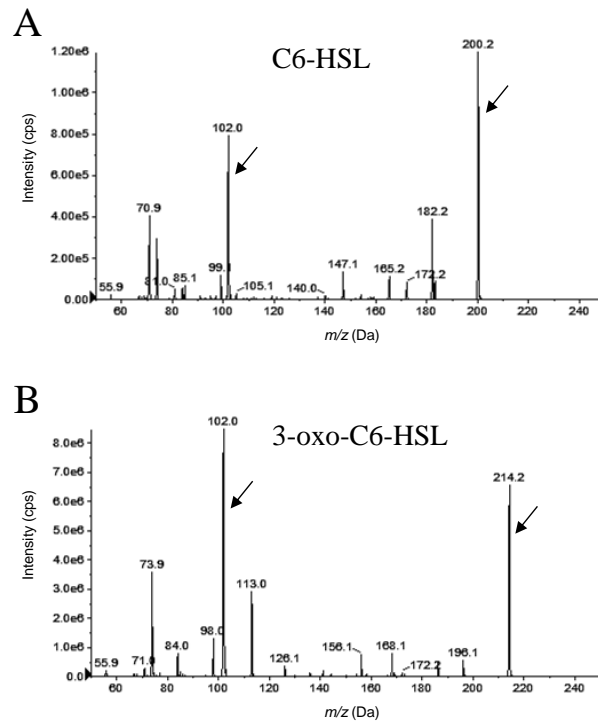

**Fig. S3.** Mass spectra of AHLs extracted from the cell-free supernatant of 508PCI for AurI. After fractionation by reverse-phase HPLC, the ESI-MS/MS fragment peaks of AHLs were analyzed. All corresponding peaks for respective C6-HSL (A;  $m/z$  200) and 3-oxo-C6-HSL (B;  $m/z$  214) along with the product ion peaks ( $m/z$  102) are marked by arrows.

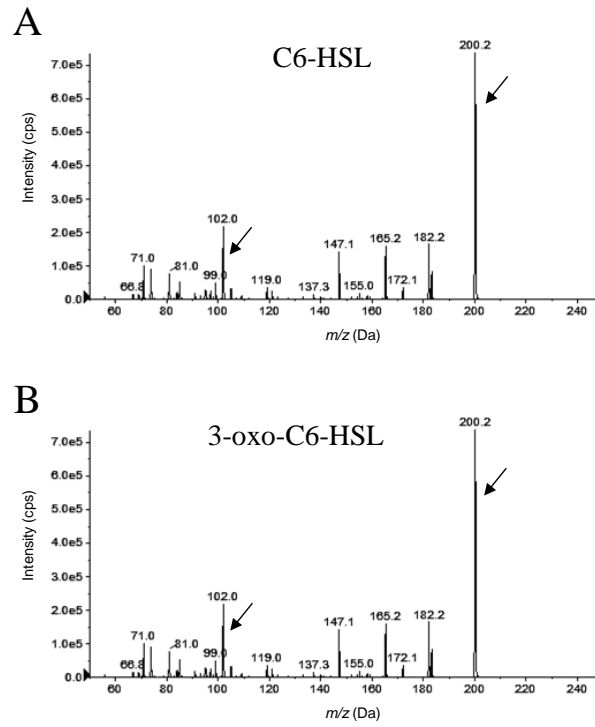

**Fig. S4.** Mass spectra of AHLs extracted from the cell-free supernatant of 508PAI for CsaI. After fractionation by reverse-phase HPLC, the ESI-MS/MS fragment peaks of AHLs were analyzed. All corresponding peaks for respective C6-HSL (A;  $m/z$  200) and 3-oxo-C6-HSL (B;  $m/z$  214) along with the product ion peaks ( $m/z$  102) are marked by arrows.

**Table S1.** Bacterial strains used in the study

| Strains                                                  | Description                                                                                                                             | Source      |
|----------------------------------------------------------|-----------------------------------------------------------------------------------------------------------------------------------------|-------------|
| <i>Escherichia coli</i>                                  |                                                                                                                                         |             |
| DH5 $\alpha$                                             | F <sup>-</sup> <i>supE44</i> $\Delta$ <i>lacU169</i> ( $\phi$ 80 <i>lacZ</i> $\Delta$ M15) <i>hsdR17 recA1 endA1 gyrA96 thi-1 relA1</i> | Nippon Gene |
| S17-1 $\lambda$ <i>pir</i>                               | <i>thi pro hsdR hsdM<sup>+</sup> recA</i> RP4 2Tc::Mu-Km::Tn7                                                                           | 19          |
| <i>Pseudomonas chlororaphis</i> subsp. <i>aurantiaca</i> |                                                                                                                                         |             |
| StFRB508                                                 | Phenazine and AHL producer isolated from potato root surface                                                                            | 11          |
| 508 $\Delta$ PI                                          | StFRB508 derivative, $\Delta$ <i>phzI</i>                                                                                               | This study  |
| 508 $\Delta$ AI                                          | StFRB508 derivative, $\Delta$ <i>aurI</i>                                                                                               | This study  |
| 508 $\Delta$ CI                                          | StFRB508 derivative, $\Delta$ <i>csaI</i>                                                                                               | This study  |
| 508 $\Delta$ PAI                                         | StFRB508 derivative, $\Delta$ <i>phzI</i> and $\Delta$ <i>aurI</i>                                                                      | This study  |
| 508 $\Delta$ ACI                                         | StFRB508 derivative, $\Delta$ <i>aurI</i> and $\Delta$ <i>csaI</i>                                                                      | This study  |
| 508 $\Delta$ PCI                                         | StFRB508 derivative, $\Delta$ <i>phzI</i> and $\Delta$ <i>csaI</i>                                                                      | This study  |
| 508 $\Delta$ PACI                                        | StFRB508 derivative, $\Delta$ <i>phzI</i> , $\Delta$ <i>aurI</i> , and $\Delta$ <i>csaI</i>                                             | This study  |
| 508 $\Delta$ PR                                          | StFRB508 derivative, $\Delta$ <i>phzR</i>                                                                                               | This study  |
| 508 $\Delta$ AR                                          | StFRB508 derivative, $\Delta$ <i>aurR</i>                                                                                               | This study  |
| 508 $\Delta$ CR                                          | StFRB508 derivative, $\Delta$ <i>csaR</i>                                                                                               | This study  |
| 508 $\Delta$ PAR                                         | StFRB508 derivative, $\Delta$ <i>phzR</i> and $\Delta$ <i>aurR</i>                                                                      | This study  |
| 508 $\Delta$ ACR                                         | StFRB508 derivative, $\Delta$ <i>aurR</i> and $\Delta$ <i>csaR</i>                                                                      | This study  |
| 508 $\Delta$ PCR                                         | StFRB508 derivative, $\Delta$ <i>phzR</i> and $\Delta$ <i>csaR</i>                                                                      | This study  |
| 508 $\Delta$ PACR                                        | StFRB508 derivative, $\Delta$ <i>phzR</i> , $\Delta$ <i>aurR</i> , and $\Delta$ <i>csaR</i>                                             | This study  |
| 508 $\Delta$ PACR                                        | StFRB508 derivative, $\Delta$ <i>phzR</i> , $\Delta$ <i>aurR</i> , and $\Delta$ <i>csaR</i>                                             | This study  |
| 508 $\Delta$ PZ                                          | StFRB508 derivative, <i>phzCDE</i> ::Km <sup>r</sup>                                                                                    | 11          |

**Table S2.** Primers used in the study

| Description                               | Primers   | Primer sequences (5'-3')*             |
|-------------------------------------------|-----------|---------------------------------------|
| Amplification of <i>phzIR</i>             | phzIR-F   | GCACTGGCGGCTACAGGAGGGAATTGGATAAACGG   |
|                                           | phzIR-R   | GATCATTAAGCCGCTAGGGGAAAGCGAAGCAGGC    |
| Deletion of <i>phzI</i> internal sequence | phzIdel-F | TCTAAGCTTCCGACACATTATTGAAAGAGACAGC    |
|                                           | phzIdel-R | TCTAAGCTTCATCGCTCATTTCGTTCAAGTGTGTGC  |
| Deletion of <i>phzR</i> internal sequence | phzRdel-F | TCTAAGCTTCGACAGCCGTAAACTCCTGCATATCC   |
|                                           | phzRdel-R | TCTAAGCTTGGCAGTGTCTTACGCAGTCGCGATGG   |
| Amplification of <i>aurIR</i>             | aurIR-F   | CGAGCAGATGGCGCCATAACCGGTTACAACACTACCC |
|                                           | aurIR-R   | CAAGGTCTGGCAGGCGCTGCTGACCATTCTTTTCG   |
| Deletion of <i>aurI</i> internal sequence | aurIdel-F | TCTAAGCTTGTGCTGTTGCTGAACATGCCGATCAG   |
|                                           | aurIdel-R | TCTAAGCTTGGCGTCGCACTATAGTCGAGCGTGTG   |
| Deletion of <i>aurR</i> internal sequence | aurRdel-F | TCTAAGCTTGCCAGAGTATTTGAGTCGACTATCC    |
|                                           | aurRdel-R | TCTAAGCTTCATTCCGGAAAGCTGCAGGTCTGC     |
| Amplification of <i>csaIR</i>             | csaIR-F   | GCGCTTTCATATCGAACAGGCGCTCAGGCTCAACC   |
|                                           | csaIR-R   | CCACCTGCTGATGGTGCGATGGTGCTGTTCTTCG    |
| Deletion of <i>csaI</i> internal sequence | csaIdel-F | TCTAAGCTTGCTTCGCTGAATCGGGTATTTCTGCG   |
|                                           | csaIdel-R | TCTAAGCTTGTGTTCGGTGAAAGCTGGCTTTCATGC  |
| Deletion of <i>csaR</i> internal sequence | csaRdel-F | TCTAAGCTTCTTCCACCTCAAGGTCATCCAGAAG    |
|                                           | csaRdel-R | TCTAAGCTTGGGAATCTAGTCCAGGGCAATACGC    |

\**Hind*III sites are underlined.
